# Supplementary material for: The transcription and export complex THO/TREX contributes to transcription termination in plants
Source: PubMed Central journal article supplement (PMC7179932; doi:10.1371/journal.pgen.1008732), 2020-04-13

**A**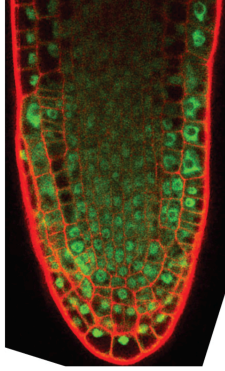

pTEX1:gTEX1::GFP

**B**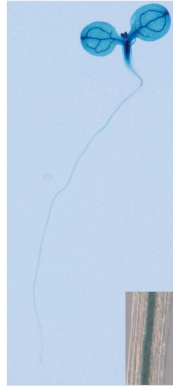

Seedling

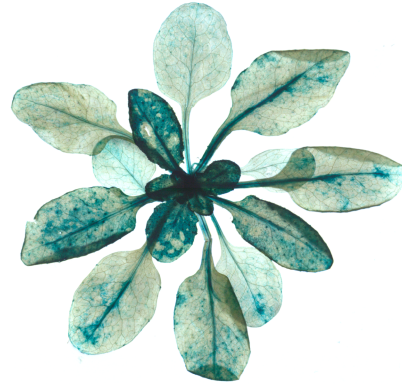

Rosettes

pTEX1:GUS

**C**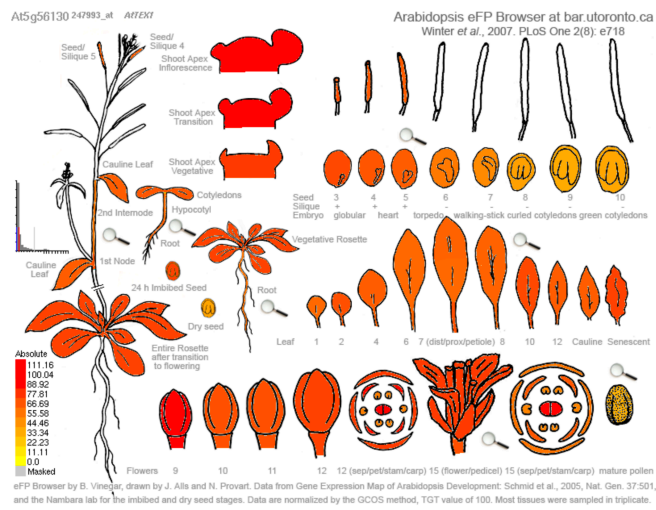

Supplement: pgen.1008732.s001.pdf [file pgen.1008732.s001.pdf]
