# Supplementary material for: The transcription and export complex THO/TREX contributes to transcription termination in plants
Source: PubMed Central journal article supplement (PMC7179932; doi:10.1371/journal.pgen.1008732), 2020-04-13
Supplement: pgen.1008732.s004.pdf [file pgen.1008732.s004.pdf]

*pho1-7tex1-4* vs *pho1-7* in pot

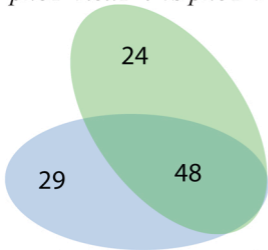

*tex1-4* vs Col0 in petris
