# Supplementary material for: The transcription and export complex THO/TREX contributes to transcription termination in plants
Source: PubMed Central journal article supplement (PMC7179932; doi:10.1371/journal.pgen.1008732), 2020-04-13

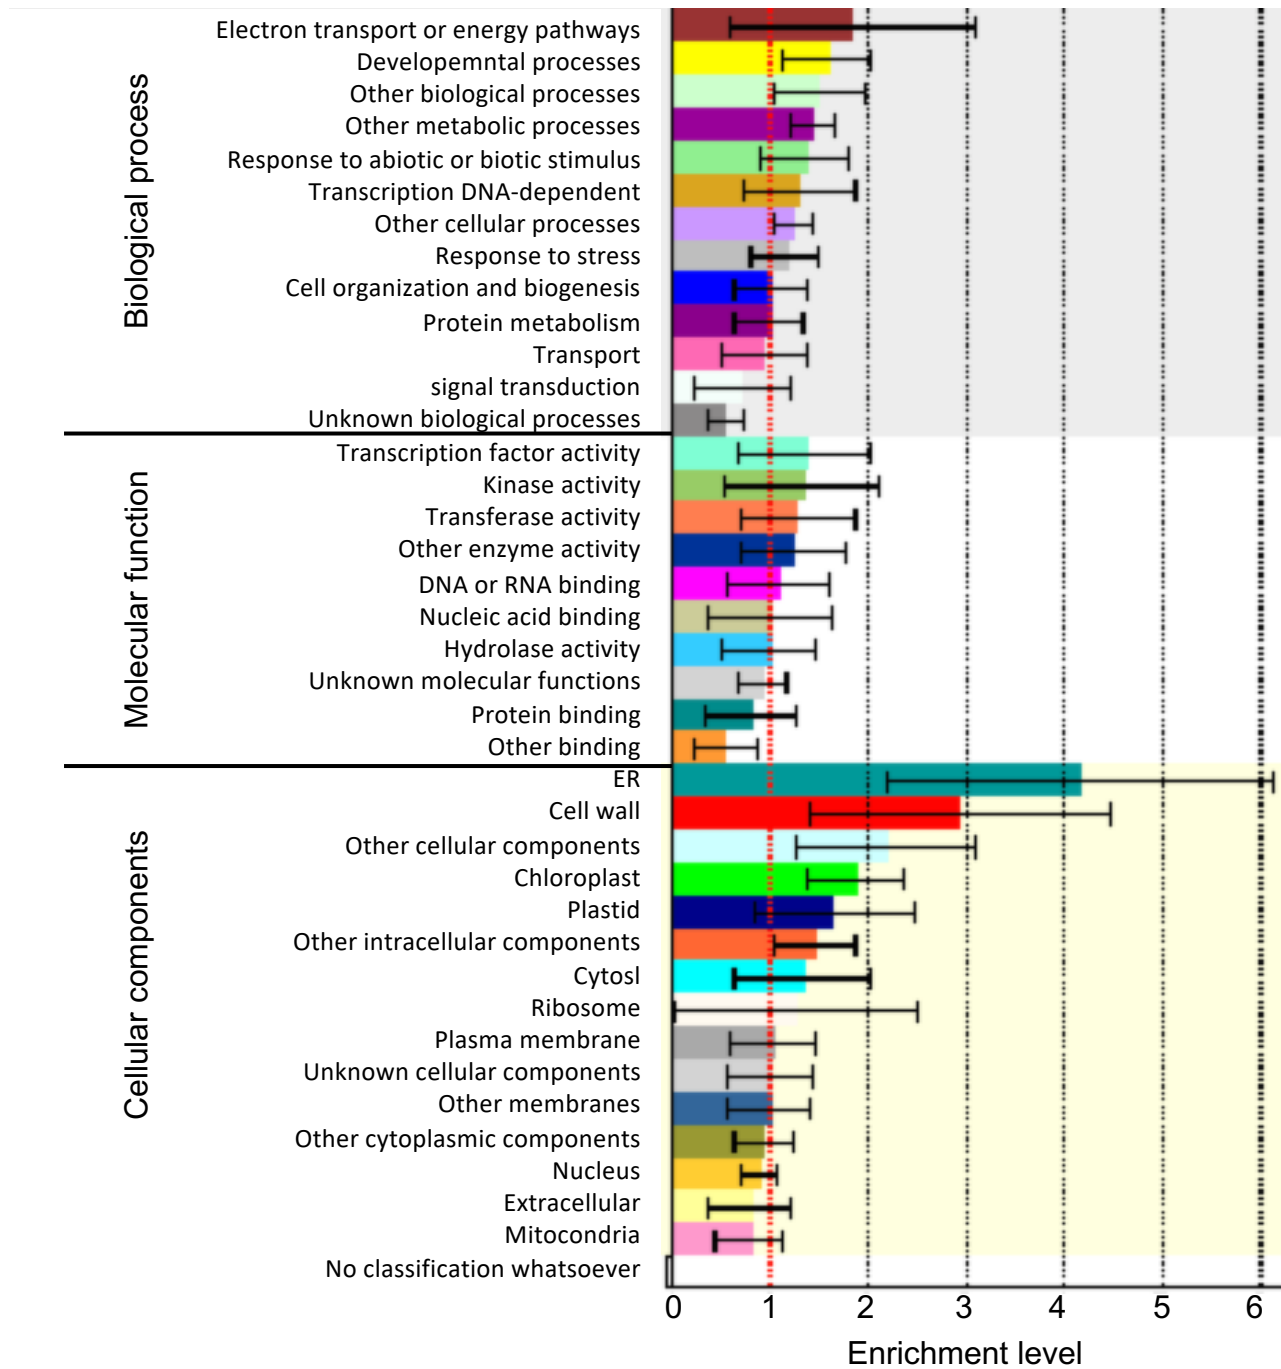

Supplement: pgen.1008732.s005.pdf [file pgen.1008732.s005.pdf]
