# Supplementary material for: The transcription and export complex THO/TREX contributes to transcription termination in plants
Source: PubMed Central journal article supplement (PMC7179932; doi:10.1371/journal.pgen.1008732), 2020-04-13
Supplement: pgen.1008732.s006.pdf [file pgen.1008732.s006.pdf]

Supplementary Text S1. Sequence of the *pho1-7* locus with the production of the truncated PHO1 protein.

**T-DNA integration in *pho1-7* mutants**

Capital letters show the exon.

Sequence highlighted in blue is T-DNA.

ATGGTGAAGTTCTCGAAGGAGCTAGAGGCACAACCTTATAACCGGAGTGGAAAGAGGCCTTTGT  
TAACTATTGTTTACTAAAGAAACAAATCAAGAAAATCAAAACCTCTCGTAAACCAAACCGG  
CTTCTCATTACCCCATTTGGTCATCACTCCGATTTTGGTCGATCTCTTTTCGACCCGGTTCGC  
AAATTGGCCAGGACCTTCTCCGATAAACTATTTTCCAACCTCAGAAAAACCAGAGATTCTCCA  
Ggtaattaatcaactacttttagttttgtccttaagaaaaacatgcttgattcctttgtcgg  
ttgaatgattagtcctaaaattccgtgtaactttgtaacctagctctttatgtctaaatgcat  
ttacggagtttgaacatgataccattaggactaaaagattacaattggtgagaccgtag  
ttttgagtttgtcggataaagaatttagattatttgtgataatgtagtgattttgttgta  
acttaatttaaatttagcgtcttttttggcccattgattgttttgtattgagtttcgtgtag  
cttacgtctttgtaattgcttacgcgtcagaattaccagttatttctgctttgtctagtact  
acatgagaaatctgcctttttctgtttttctactttcttacaatattgatttgcttttcaa  
aatatttattaacgagatattgaaattttacatatttgacatgatttggtagagttctaata  
tgtaattccttgtagagtaagtggtaattttgtgtgtgtattaatatgtaatatataca  
tatctaagtatttctgttcaggaaaacaatcattatacacatgatttagaccctatagctca  
tatcttaacctagtaacctaccgctttccaaaattaagaaaaatcctataaattaactaacc  
ctgaaatctgcaaaatatataattttgcggaataaataatgcttCCGGCTCTATCAAACACTG  
ATAGTTTAAACTGAAGGCGGAAACCGAAATCTAATAAGGGGGGAAAAATAAGGGGAGCCAC  
TTTATCCCCCGCCGATGACGCGGGACAAGCCGTTTACGTTTGGAACTGACAGAACCGCA  
ACGTTGAAGGAGCCACTCAGCCGCGGGTTTCTGGAGTTAATGAGCTAAGCACATACGTCAG  
AAACCATTATTGCGCGTTCAAAGTCGCCTAAGGTCACTATCAGCTAGCAAATATTTCTTGT  
CAAAAATGCTCCACTGACGTTCCATAAATTCCCCTCGGTATCCAATTAGAGTCTCATATTC  
CTCTCAA+CCAAATAATCTGCACCGGATCTGGATCGTTTCGCATGATTGAACAAGATGGATT  
GCACGCAGGTTCTCCGGCCGCTTGGGTGGAGAGGCTATTCGGCTATGACTGGGCACAACAGA  
CAATCGGCTGCTCTGATGCCGCCGTGTTCCGGCTGTCAGCGCAGGGGCGCCCGTTCTTTTT  
GTCAAGACCGACCTGTCCGGTGCCCTGAATGAACTGCAGGACGAGGCAGCGCGGCTATCGTG  
GCTGGCCACGACGGGCGTTCCFTTGCAGCTGTGCTCGACGTTGTCACTGAAGCGGGAAGGG  
ACTGGCTGCTATTGGGCGAAGTGCCGGGGCAGGATCTCCTGTCATCTCACCTTGCTCCTGCC  
GAGAAAGTATCCATCATGGCTGATGCAATGCGGCGGCTGCATACGCTTGATCCGGCTACCTG  
CCATTTCGACCACCAAGCGAAACATCGCATCGAGCGAGCACGTACTCGGATGGAAGCCGGTC  
TTGTGATCAGGATGATCTGGACGAAGAGCATCAGGGGCTCGCGCCAGCCGAAGTTCGCC  
AGGCTCAAGGCGCGCATGCCGACGGCGATGATCTCGTCTGACCCATGGCGATGCCTGCTT  
GCCGAATATCATGGTGGAAAATGGCCGCTTTTCTGGATTTCATCGACTGTGGCCGGCTGGGTG  
TGGCGGACCGCTATCAGGACATAGCGTTGGCTACCCGTGATATTGCTGAAGAGCTTGGCGGC  
GAATGGGCTGACCCTTCCCTCGTGCTTTACGGTATCGCCGCTCCAgtagttCGATTGCGAG  
CGCATCGCCTTCTATCGCCTTCTGACGAGTTCTTCTGAGCGGGACTCTGGGGTTCGAAATG  
ACCGACCAAGCGACGCCAACCTGCCATCACGAGATTCGATTCCACCGCCGCTTCTATGA  
AAGGTTGGGCTTCGGAATCGTTTTCCGGGACGCCGGCTGGATGATCCTCCAGCGCGGGGATC  
TCATGCTGGAGTTCTTCGCCACGGGATCTCTGCGGAACAGGCGGTTCGAAGGTGCCGATATC  
ATTACGACAGCAACGGCCGACAAGCACAACGCCACGATCCTGAGCGACAATATGATCGGGCC  
CGGCGTCCACATCAACGGCGTCGGCGGCGACTGCCAGGCAAGACCGAGATGCACCGCGATA  
TCTTGCTGCGTTCGGATATTTTCGTGGAGTTCGCCACAGACCCGGATGATCCCCGATCGT  
TCAAACATTTGGCAATAAAGTTTCTTAAGATTGAATCCTGTTGCCGGTCTTGGCGATGATTAT  
CATATAATTTCTGTTGAATTACGTTAAGCATGTAATAATTAACATGTAATGCATGACGTTAT  
TTATGAGATGGGTTTTTATGATTAGAGTCCCGCAATTATACATTTAATACCGGATAGAAAAC  
AAAATATAGCGCGAACTAGGATAAATTATCGCGCGGGTGTCTATCTATGTTACTAGATCG  
GGCTCCTGTCAATGCTGGCGGCGGCTCTGGTGGTGGTTCTGGTGGCGGCTCTGAGGGTGGT  
GGCTCTGAGGGTGGCGGTTCTGAGGGTGGCGGCTCTGAGGGAGGCGGTTCCGGTGGTGGCTC  
TGGTTCCGGTGATTTTGATTATGAAAAGATGGCAAACGCTAATAAGGGGGCTATGACCGAAA

ATGCCGATGAAAACGCGCTACAGTCTGACGCTAAAGGCAAACCTTGATTCTGTGCTACTGAT  
TACGGTGCTGCTATCGATGGTTTCATTGGTGACGTTTCCGGCCTTGCTAATGGTAATGGTGC  
TACTGGTGATTTTGTCTGGCTCTAATTCCCAAATGGCTCAAGTCGGTGACGGTGATAATTCAC  
CTTTAATGAATAATTTCCGTCAATATTTACCTTCCCTCCCTCAATCGGTTGAATGTCGCCCT  
TTTGTCTTTGGCCCAATACGCAAACCGCCTCTCCCCGCGCGTTGGCCGATTCATTAATGCAG  
CTGGCAGCAGAGGTTTCCCGACTGGAAAGCGGGCAGTGAGCGCAACGCAATTAATGTGAGTT  
AGCTCACTCATTAGGCACCCAGGCTTTACACTTTATGCTTCCGGCTCGTATGTTGTGTGGA  
ATTGTGAGaagCGGATAACAATTTACACACAGGAAACAGCTATGACCATGATTACGCCAAGCT  
TGCATGCCTGCAGGTCCCAGATTAGCCTTTTCAATTTTCAGAAAGAATGCTAACCCACAGAT  
GGTTAGAGAGGCTTACGCAGCAGGTCTCATCAAGACGATCTACCCGAGCAATAATCTCCAGG  
AAATCAAATACCTTCCCAAGAAGGTTAAAGATGCAGTCAAAGATTTCAGGACTAACTGCATC  
AAGAACACAGAGAAAGATATATTTCTCAAGATCAGAAGTACTATTCCAGTATGGACGATTCA  
AGGCTTGCTTCACAAACCAAGGCAAGTAATAGAGATTGGAGTCTCTAAAAAGGTAGTTCCCA  
CTGAATCAAAGGCCATGGAGTCAAAGATTCAAATAGAGGACCTAACAGAACTCGCCGTAAAG  
ACTGGCGAACAGTTCATACAGAGTCTTTACGACTCAATGACAAGAAGAAAATCTTCGTCAA  
CATGGTGGAGCACGACACACTTGTCTACTCCAAAAATATCAAAGATACAGTCTCAGAAGACC  
AAAGGGCAATTGAGACTTTTCAACAAAGGGTAATATCCGGAAACCTCCTCGGATTCCATTGC  
CCAGCTATCTGTCACTTTATTGTGAAGATAGTGGAAAAGGAAGGTGGCTCCTACAAATGCCA  
TCATTGCGATAAAGGAAAGGCCATCGTTGAAGATGCCTCTGCCGACAGTGGTCCCAAAGATG  
GACCCACACCACGAGGAGCATCGTGGAAAAAGAAGACGTTCCAACCACGTCTTCAAAGCAA  
GTGGATTGATGTGATATCTCCACTGACGTAAGGGATGACGCACAATCCCACTATCCTTCGCA  
AGACCCTTCTCTATATAAGGAAGTTCATTTCAATTTGGAGAGAaagtACACGGGGGACTCTA  
GAGGATCCCCGGGTACCGAGCTCGAATTTCCCGATCGTTCAAACATTTGGCAATAAAGTTT  
CTTAAGATTGAATCCTGTTGCCGGTCTTGGCGATGATTATCATATAATTTCTGTTGAATTACG  
TTAAGCATGTAATAATTAACATGTAATGCATGACGTTATTTATGAGATGGGTTTTTATGATT  
AGAGTCCCGCAATTATACATTTAATACGCGATAGAAAACAAAATATAGCGCGCAAACCTAGGA  
TAAATTATCGCGCGCGGTGTCATCTATGTTACTAGATAaaggCGGGAATTCACTGGCCGTCGT  
TTTACAACGTCGTGACTGGGAAAACCCTGGCGTTACCCAACCTTAATCGCCTTGCAGCACATC  
CCCCTTTCGCCAGCTGGCGTAATAGCGAAGAGGCCCGCACCGATCGCCCTTCCCAACAGTTG  
CGCAGCCTGAATGGCGCCCGCTCCTTTTCGTTTTCTTCCCTTCTTCTCGCCACGTTTCGCCG  
GCTTTCCCGTCAAGCTCTAAATCGGGGGCTCCCTTTAGGGTTCCGATTTAGTGCTTTACGG  
CACCTCGACCCCAAAAAACTTGATTGGGGTgAtAGGTTACGTTAGTGGGCCATCGCCCTGAT  
AGACGGTTTTTTCGCCCTTTGACGTTGGAGTCCACGTTCTTTAATAGTGGACTCTTGTTCCAA  
ACTGGAACAACACTCAACCCTATCTCGGGCTATTCTTTTGGATTTATAAGGGATTTTGCCGAT  
TTCGGAACCACCATCAAACAGGATTTTCGCCTGCTGGGGCAAACCAGCGTGGACCGCTTGCT  
GCAACTCTCTCAGGGCCAGGCGGTGAAGGGCAATCAGCTGTTGCCCGTCTCACTGGTGAAAA  
GAAAACCACCCAGTACATTAAAAACGTCCGCAATGTGTTATTAAGTTGTCTAAGCGTCAA  
TTTGTTTACACCACAATAtaattacatccctatatattttttctataaaagctgaaacttaa  
atthttatttattattgggattctatataactagctatattaataactctttttgcttatactg  
tataagcttgaaataaggacctatttttgggtgcatttatttgactttattaatatcatcat  
cactattactatattacgaattcctttttcttaagcttcaaaagcagaaaattaataacat  
agcacatagagatagtggtttttattgctagcctaaattgcacaacacgaccacatccta  
cctaataagatggtcaaatttagactactttttcttccattaagagtttataaatgtttg  
atctgtatthtgaatgctttttggtattggtacttttagGTTAAAGTGTTCGCTAGATTGGA  
TGAAGAACTAAACAAAGTGAATCAGTTTACAAGCCCAAAGAAACAGAGTTTTTGGAAAGAG  
GAGAGATTCTGAAGAAACAGTTGGAGACTCTTGCAGAACTCAAACAGATCTTAAGTGATCGG  
AAGAAGAGAACTTGTCTGGCTCAAATTCACATCGCTCCTTCTCATCTTCTGTTTCGAAACTC  
TGATTTCTCTGCAGgtttagtcttcttcttattaatgcttttactacaagttaggtcagattt  
agggtacttttagtaaattctgcatthttgacttaagagtttaagactcttatta  
aatgcttaacc  
attagtatatttgagatatgacgcgccctgcaccattagaaatcaciaaagtgcattgctcct  
agaggccgtttacgtagtgcggttagtaaaaagaaaagtaggttatttaataatthttat  
atc  
attgcacaatttagcgtttttgaaataatttaagtaaaaattcaaatgthttgtataacac

aatagaaattctactactgaatgacaagatttgtaagcatacaaatcttttgcattggtg  
gcaaaactcgaagctgcatatatgtgaaagaagaatttttagagttttgagattttattatg  
tagacatgcataatccttcaatggccgacaagaacacaaatcgatttactaacaacgaacaa  
aatgtttgtgagtaagaaaataaaaatggaccgacaatagatggctaggtcgacaaaaattt  
ttattttcttcttctcttttagacctgtgttaatagtcacaaaatatataattatttgaatt  
tattttttcttattgttcagGGTCTCCAGGAGAACTAAGTGAGATACAAAGTGAAACATCAA  
GAACAGATGAAATCATAGAGGCCTTAGAGAGGAACGGTGTGAGTTTCATAAACTCTGCAACG  
AGGAGCAAAACAAAAGGAGGCAAAACAAAATGTCTCTCCGCGTCGACATTCCEGACGCTGT  
GGCCGGAGCCGAAGGTGGTATCGCAAGATCCATCGCCACCGCCATGTCTGTTCTTTGGGAAG  
AGCTCGTTAAACAACCCAAGATCAGATTTACCAACTGGAAAAATATTCAAAGCGCCGAGAAG  
AAGATACGAAGTGCCTTTGTGAACTCTATAGAGGTCTTGGCTTGTAAAGACTTACAGgta  
tattcattaatgactcaatatcatttatttatttagtgatgatcttatcatttttaattctt  
ttgttggtcttattatggcagCTCGTTGAATATGATAGCTTTCACAAAAATAATGAAGAAAT  
TCGATAAGgtaaattgggttatagattgtactttcggtgataaaccaatgaaaagataatca  
tagtggttaatgatgaatctttgatataatgaatcatcagGTTGCTGGTCAGAAATGCAT  
CATCAACGTATCTCAAAGTCGTAAAGAGATCGCAATTTATCAGCTCTGATAAGgtaaaataa  
aaggaggtcttatgctatgaataatttattgaaagattgtttgaaaatgattgtttgattaa  
aattaaaaaagGTGGTAAGACTTATGGACGAAGTGGAGTCCATATTCACAAAGCACTTCGCC  
ACAATGACAGGAAAAAGGCCATGAAATTTTGAAACCCCACCAGACCAAAGATTCTCACAT  
GGTCACTTTCTTTGTTGgtacttatttcattttctctatctttataacctttataaccattc  
aaaaaacagttcatcagagttttaacaaattgagattgtgtatctatgcagGGTTATTTAC  
GGTGTCTTCATCTCATTTGTTTGTATTTACATAAATACTAGCCCATCTTTCTGGAATCTTCA  
CTTCTAGTGATCAAGTCTCTTATCTGGAGACTGTTTATCCTGTTTTCAGgtaaatgaataatt  
atacgaattaatgatcaattcaacaaaactgtcaccatccaatgagacttaaccatttatcg  
cttacattttgatgatttttttaaaaacgcagCGTTTTTGCCTTGCTGAGTCTACACATGT  
TCATGTATGGATGCAATCTATACATGTGGAAGAACACGAGGATAAACTACACCTTTATTTTT  
GAGTTTGCACCAACACAGCGTTGCGTTACCGAGACGCGTTTCTGATGGGAACCACGTTTCAT  
GACCTCAGTTGTGGCAGCTATGGTCATCCACCTCATCCTCCGAGCCTCCGGTTTCTCAGCTA  
GTCAAGTAGACACCATTCCAGGCATCCTCCTCCTGgtaaatcaaatcttagttcattaat  
tatcatatggcgcggttcaatcgcaatcgctatcacaatcacaatttgaaaccgctaatttc  
tttttcggtgtgcatgctacagATCTTCATATGCGTCTTGATATGCCCATTTAACACATTCT  
ACCGTCCAACAAGGTTCTGCTTCATCCGCATCTTGCGGAAGATTGTTTGCTCACCGTTCTAC  
AAGgtaacaattggagttatttgggtactttcagcacaagaatagcagaacatgattttt  
ttttcttgtagcggtaaattagGTTTTGATGGTTGATTTCTTCATGGGCGATCAACTTACTA  
GCCAGgtaaaactaagttatgcaacttcaatagatgggtgacgacatctaatttagtcgataa  
ttaaccattaatcggttctattcagATTCCATTGCTGAGACACCTTGAGACAACCGGGTG  
TTACTTCTTGGCTCAAAGCTTCAAACCTCACGAATACAATACCTGCAAAAACCGGAAGATACT  
ATAGAGAATTTGCTTACTTGATTTCTTTCTTACCCTACTTCTGGCGTGCCATGCAAgtagc  
tcacttagggtttctctgtttttttttttttttttgtcaagtccttaaaacctttcttctaa  
gacactatgaacattaatttacagTGTGTAAGGAGATGGTGGGACGAATCAAACCTGATCA  
CCTAATCAACATGGGAAAATACGTGTCAGCGATGGTTGCAGCCGGAGTCCGCATAACCTACG  
CGAGAGAAAACAACGACTTGTGGTTAACAATGGTGCTCGTAAGCTCCGTTGTGGCAACTATT  
TACCAATTATACTGGGACTTTGTCAAGGATGGGGTCTTCTAAACCCTAAATCGAAAAATCC  
ATGGCTAAGAGACAATTTGGTTCTCCGGAACAAGAACTTCTACTACCTCTCCATTgtaagcc  
aattacataactaactatagcgtgtttcacaatttatgatcttcgactaaatgttgagttgt  
tcagGCGTTGAATTTGGTGTGCGAGTTGCTTGGATCGAGACAATTATGAGATTCAGGGTCA  
GTCTGTTCAGTCTCATTTGCTAGATTTCTTCTTGGCGTCACTTGAAGTCATTCGTGCGAGGC  
CACTGGAACCTTTTACAGgtaataaaaaaacttcacctaggtttattaaaacttgattttgg  
atgttattgaacatgaatctttctttcgggtatttacagAGTGGAGAATGAGCACTTAAACAA  
TGTCGGCCAATTTAGGGCAGTGAAGACCGTACCGTTACCGTTCTTGACAGGGACTCAGACG  
GTTAA

## PHO1 coding cDNA

Sequence highlighted in green is deleted in *pho1-7* mutants (exon 2)

ATGGTGAAGTTCTCGAAGGAGCTAGAGGCACAACCTTATACCGGAGTGGAAGAGGCCTTTGTTAAC  
TATTGTTTACTAAAGAAACAAATCAAGAAAATCAAAACCTCTCGTAAACCAAACCGGCTTCTCATT  
CCCCATTGGTCATCACTCCGATTTTGGTCGATCTCTTTTCGACCCGGTTCGCAAATTGGCCAGGACCT  
TCTCCGATAAACTATTTTCCAACCTCAGAAAAACAGAGATTCTCCAGGTAAGGAGAAGAAGAGGTA  
GCTCAGAACTGGGGATGACGTCGATGAGATTTACCAAACCTGAACTTGTTTCAGTTGTTTTCCGAAGA  
AGACGAGGTTAAAGTGTTCGCTAGATTGGATGAAGAACTAAACAAAGTGAATCAGTTTCACAA  
GCCCAAAGAAACAGAGTTTTTGGAAAGAGGAGAGATTCTGAAGAAACAGTTGGAGACTCTTGCAG  
AACTCAAACAGATCTTAAGTGATCGGAAGAAGAGAACTTGTCTGGCTCAAATTCACATCGCTCCTT  
CTCATCTTCTGTTTCGAAACTCTGATTTCTCTGCAGGGTCTCCAGGAGAATAAGTGAGATACAAAGT  
GAAACATCAAGAACAGATGAAATCATAGAGGCCTTAGAGAGGAACGGTGTGAGTTTCATAAACTCT  
GCAACGAGGAGCAAACAAAAGGAGGCCAAACCAAATGTCTCTCCGCGTCGACATTCGCGACGCT  
GTGGCCGGAGCCGAAGGTGGTATCGCAAGATCCATCGCCACCGCCATGTCTGTTCTTTGGGAAGAG  
CTCGTTAACAACCAAGATCAGATTTACCAAACCTGGAAAAATATTCAAAGCGCCGAGAAGAAGATA  
GAAGTGCCTTTGTTGAACTCTATAGAGGTCTTGGCTTGTTAAAGACTTACAGCTCGTTGAATATGATA  
GCTTTCACAAAAATAATGAAGAAATTCGATAAGGTTGCTGGTCAGAATGCATCATCAACGTATCTCA  
AAGTCGTAAAGAGATCGCAATTTATCAGCTCTGATAAGGTGGTAAGACTTATGGACGAAGTGGAGT  
CCATATTCACAAAGCACTTCGCCAACAATGACAGGAAAAAGGCCATGAAATTCCTGAAACCCACCA  
GACCAAGATTCTCACATGGTCACTTTCTTTGTTGGGTTATTTACGGGTTGCTTCATCTCATTGTTTGT  
TATTTACATAATACTAGCCCATCTTTCTGGAATCTTCACTTCTAGTGATCAAGTCTCTTATCTGGAGAC  
TGTTTATCCTGTTTTACGCGTTTTTGCCTGCTGAGTCTACACATGTTTCATGTATGGATGCAATCTATA  
CATGTGGAAGAACACGAGGATAAACTACACCTTTATTTTTGAGTTTGCACCAAACACAGCGTTGCGT  
TACCGAGACGCGTTTCTGATGGGAACACGTTTCATGACCTCAGTTGTGGCAGCTATGGTCATCCACC  
TCATCCTCCGAGCCTCCGTTTTCTCAGCTAGTCAAGTAGACACCATTCCAGGCATCCTCCTCCTGATC  
TTCATATGCGTCTTGATATGCCCATTTAACACATTCTACCGTCCAACAAGGTTCTGCTTCATCCGCATC  
TTGCGGAAGATTGTTTGTCTACCGTTCTACAAGGTTTTGATGGTTGATTTCTTCATGGGCGATCAACT  
TACTAGCCAGATTCCATTGCTGAGACACCTTGAGACAACCGGGTGTACTTCTTGGCTCAAAGCTTCA  
AACTCACGAATACAATACCTGCAAAAACGGAAGATACTATAGAGAATTTGCTTACTTGATTTCTTTC  
TTACCCTACTTCTGGCGTGCCATGCAATGTGTAAGGAGATGGTGGGACGAATCAAACCCTGATCACC  
TAATCAACATGGGAAAATACGTGTCAGCGATGGTTGCAGCCGGAGTCCGCATAACCTACGCGAGAG  
AAAACAACGACTTGTGGTTAACAATGGTGTCTCGTAAGCTCCGTTGTGGCAACTATTTACCAATTATAC  
TGGGACTTTGTCAAGGATTGGGGTCTTCTAAACCCTAAATCGAAAAATCCATGGCTAAGAGACAATT  
TGTTTCTCCGGAACAAGAATTCTACTACCTCTCATTGCGTTGAATTTGGTGTGCGAGTTGCTTGG  
ATCGAGACAATTATGAGATTCAGGGTCAGTCTGTTTCAGTCTCATTGCTAGATTTCTTCTTGGCGTC  
ACTTGAAGTCATTGTCGAGGCCACTGGAACCTTTACAGAGTGGAGAATGAGCACTTAAACAATGTC  
GGCCAATTTAGGGCAGTGAAGACCGTACCGTTACCGTTCTTGACAGGGACTCAGACGGTTAA

## PHO1 protein sequence

Sequence highlighted in red is deleted in *pho1-7* mutants

Sequence underlined form the 3 SPX subdomains, with amino acids in **green** involved in inositol polyphosphate binding

MVKFSKELEAQLIPEWKEAFVNYCLL**KKQIKKIKTSRKPKPASHYPIGHHSDFGRSLFDPVRKLARTFSDKL**  
FSNSEKPEILQ**VRRRRGSSETGDDVDEIYQTELVQLFSEED**EVKVFFARLDEELNKVNQFHKP**KETEFLER**  
EILKKQLETLAELKQILSDRKKRNLSGNSHRFSSSVRNSDFSAGSPGELSEIQSETSRTDEIIEALERNGVS  
FINSATRSKTKGGKPKMSLRVDIPDAVAGAEGGIARSIATAMSVLWEELVNNPRSDFTNWKNIQSAEKKI  
RSAFVELYRGLGLLKTYSSLNMIAFT**KIM****KKFD**KVAGQNASSTYLKVVKRSQFISSDKVVRLMDEVESIFTK  
HFANDRKKAMKFLKPHQTKDSHMVTFVGLFTGCFISLFVIYIILAHLSGIFTSSDQVSYLETVYPVFSVFA  
LLSLHMFMYGCNLYMWKNTRINYTFIFEFAPNTALRYRDAFLMGTFMTSVVAAMVIHLILRASGFSAS  
QVDTIPGILLIFICVLICPFNTFYRPTRFCFIRILRKIVCSPFYKVLMVDFFMGDQLTSQIPLLRHLETTGCYFL  
AQSFKTHEYNTCKNGRYYREFAYLISFLPYFWRAMQCVRRWWDESNPDHLINMGKYVSAMVAAGVRI  
TYARENNDLWLTMVLVSSVVATIYQLYWDFVKDWGLLNPKSKNPWLRDNLVLRNKNFYYSIALNLVLR  
VAWIETIMRFRVSPVQSHLLDFFLASLEVIRRGHWNFYRVENEHLNNVGQFRAVKTVPLPFLDRDSDG
